# Supplementary material for: One-dimensional DABCO hydrogen-bonding chain in a hexagonal channel of magnetic [Ni(dmit)2]
Source: Royal Society of Chemistry journal article supplement (doi:10.1039/d0dt03386c), 2020-01-01
Supplement: d0dt03386c1.pdf [file d0dt03386c1.pdf]

## Supporting Information

### One-dimensional DABCO hydrogen-bonding chain in a hexagonal channel of magnetic [Ni(dmit)<sub>2</sub>]

Simin Li,<sup>[a]</sup> Kiyonori Takahashi,<sup>[a,b]\*</sup> Ichiro Hisaki,<sup>[c]</sup> Kenta Kokado, <sup>[a,b,d]</sup>  
Takayoshi Nakamura<sup>[a,b]\*</sup>

<sup>a</sup> Graduate School of Environmental Science, Hokkaido University, N10W5, Kita-ku, Sapporo 060-0810, Japan

<sup>b</sup> Research Institute for Electronic Science (RIES), Hokkaido University, N20W10, Kita-ku, Sapporo, 001-0020, Japan

<sup>c</sup> Graduate School of Engineering Science, Osaka University, 1-3, Machikaneyama, Toyonaka, Osaka, 560-0043, Japan

<sup>d</sup> JST-PRESTO, Honcho 4-1-8, Kawaguchi, Saitama 332-0012, Japan.

E-mail: (KT) ktakahashi@es.hokudai.ac.jp, (TN) tnaka@es.hokudai.ac.jp

#### Table of Contents

#### **§1. Experiments**

#### **§2. Thermogravimetry-differential thermal analysis for crystal 1**

#### **§3. Differential scanning calorimetry analysis for 1**

#### **§4. Powder x-ray diffraction analysis for 1**

#### **§5. Crystal Structure of 1**

#### **§6. Temperature- and frequency-dependent dielectric loss tangent and Arrhenius plot for crystal 1**

#### **§7. References**

## §1. Experiments

### Differential Scanning Calorimetry (DSC)

DSC measurement was carried out with a Q2000 differential scanning calorimeter (TA Instruments) in the temperature range 193-413 K at a heating rate of  $5 \text{ K} \cdot \text{min}^{-1}$  and a cooling rate of  $5 \text{ K} \cdot \text{min}^{-1}$  under a flow of  $\text{N}_2$  gas (flow rate  $50 \text{ mL} \cdot \text{min}^{-1}$ ).

### Powder X-ray diffraction (PXRD) analysis

Powder X-ray diffraction (XRD) patterns were measured with a Rigaku RINT2100 in the  $2\theta$  region of  $5 - 50^\circ$ . The measurements were performed with  $\text{Cu K}\alpha$  radiation ( $\lambda = 1.5418 \text{ \AA}$ ) at scanning rate of  $1.2^\circ \cdot \text{min}^{-1}$  under an applied electric voltage and current of 40 KV and 40 mA, respectively.

## §2. Thermogravimetry-differential thermal analysis for 1

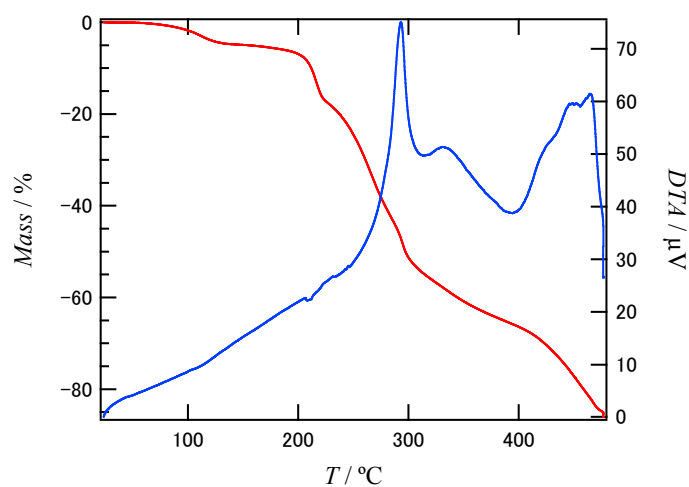

**Fig. S1** TG-DTA measurement for crystal **1**. The weight loss at 128 °C was 4.45 % corresponding to 6 molecules of  $\text{CH}_3\text{CN}$ .

### §3. Differential scanning calorimetry analysis for 1

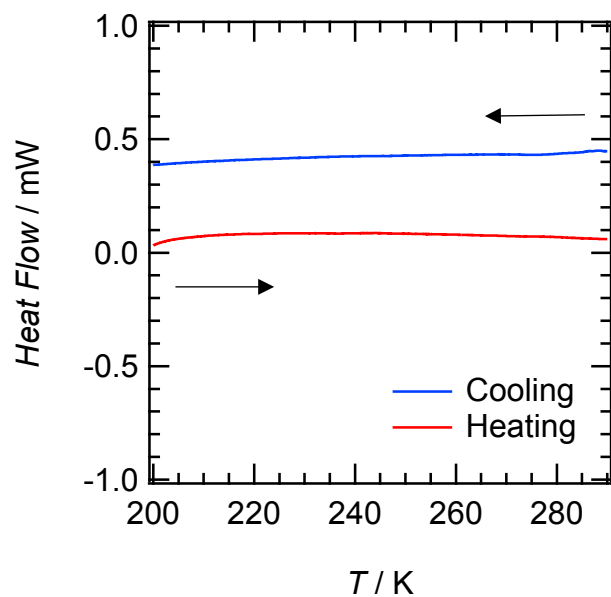

**Fig. S2** DSC measurement for crystal **1**. Blue and red lines correspond to cooling and heating cycles, respectively.

### §4. Powder x-ray diffraction analysis for 1

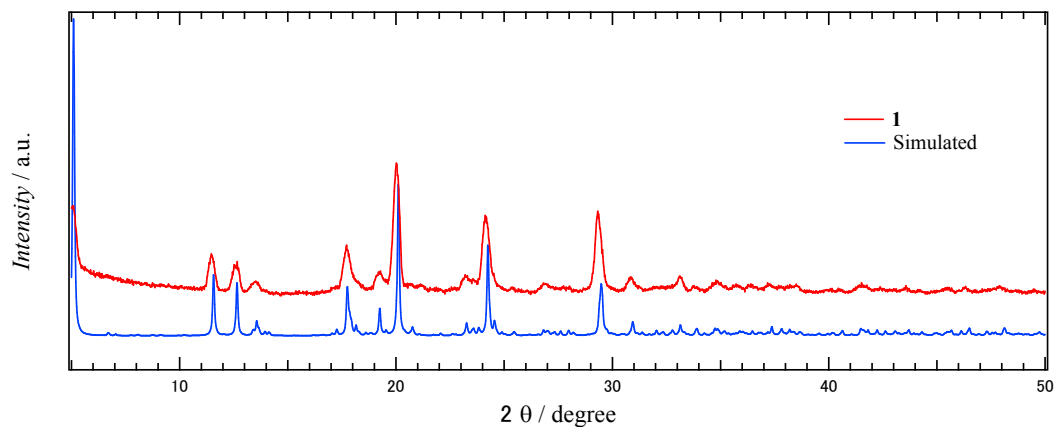

**Fig. S3** PXRD measurement for crystal **1**. Simulated pattern was compared to the obtained pattern to confirm the purity of the crystal.

## §5. Crystal structure of 1

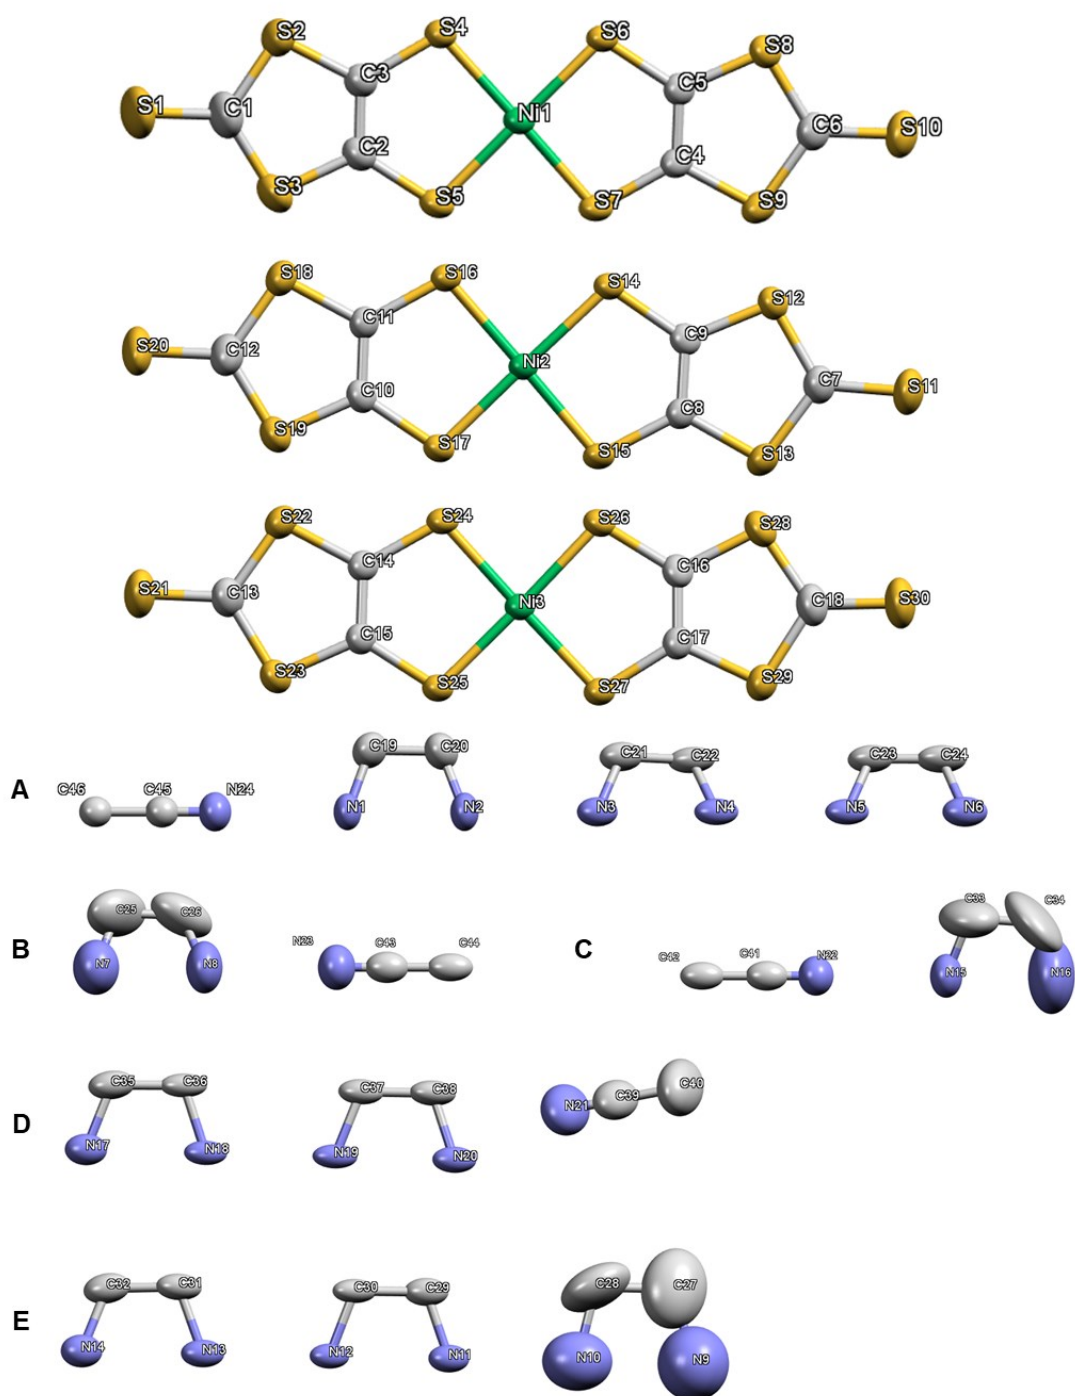

**Fig. S4** Crystallographically independent structures of crystal 1 at 173 K. Hydrogen atoms are omitted for clarity. Units A-E correspond to hydrogen-bonding units.

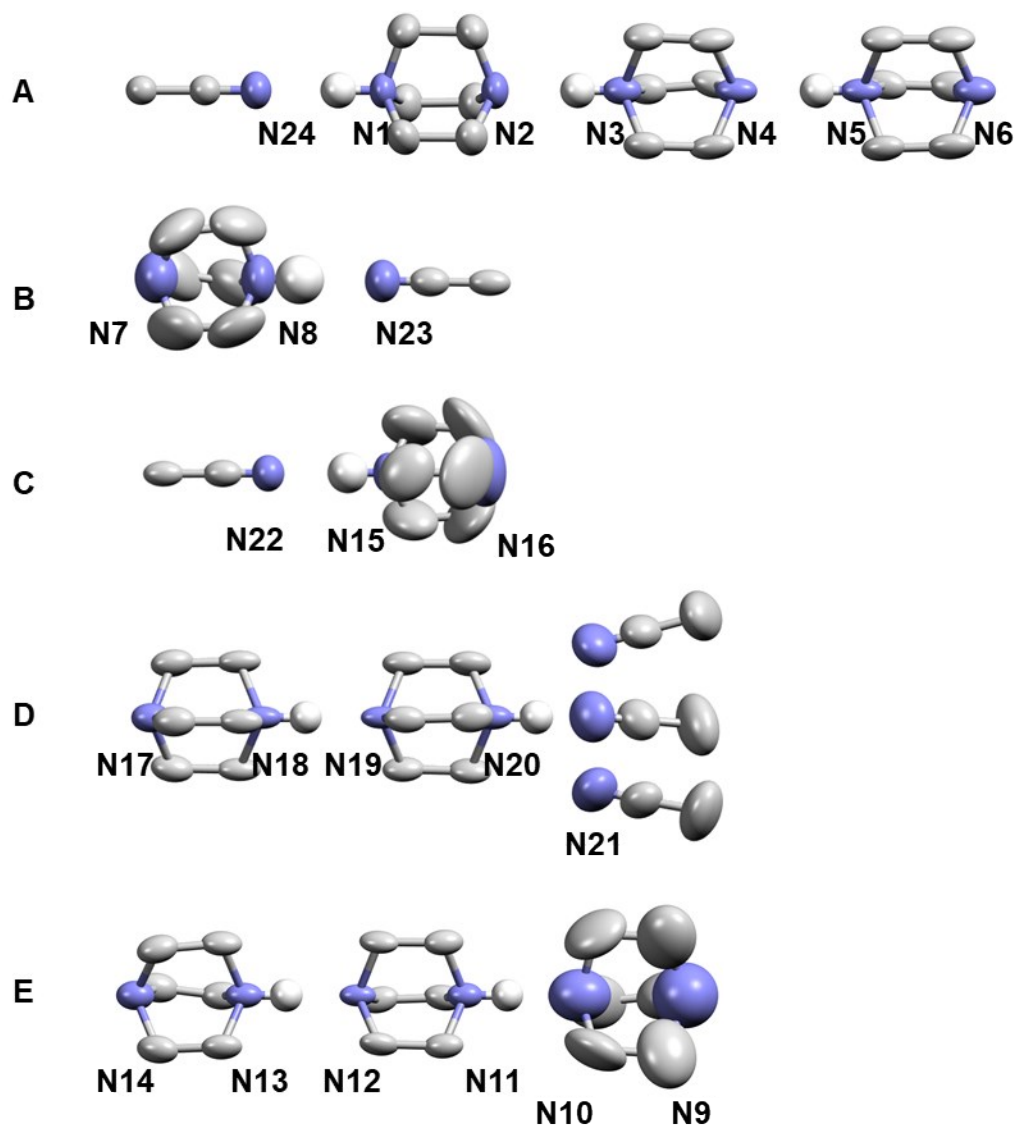

**Fig. S5** Hydrogen-bonding units of A-E at 173 K. The corresponding hydrogen bonding lengths and angles are reported in the Table S1. C, N, and H atoms are depicted in dark-gray, light-blue, and light-gray, respectively.

**Table S1.** Distances and angles in and between hydrogen bonding units displayed in Fig. S4.

| Hydrogen-bonding unit |           | Distance / Å | Angle / degree |
|-----------------------|-----------|--------------|----------------|
| <b>A</b>              | N24...N1  | 2.856        | 180            |
|                       | N2...N3   | 2.863        | 180            |
|                       | N4...N5   | 2.818        | 180            |
| <b>A...B</b>          | N6...N7   | 3.393        | ---            |
| <b>B</b>              | N8...N23  | 2.993        | 180            |
| <b>C</b>              | N22...N15 | 2.977        | 180            |
| <b>C...D</b>          | N16...N17 | 3.267        | ---            |
| <b>D</b>              | N18...N19 | 2.740        | 180            |
|                       | N20...N21 | 3.000        | 124.72         |
| <b>E</b>              | N13...N12 | 2.694        | 180            |
|                       | N11...N10 | 2.728        | 180            |
| <b>E...E</b>          | N9...N9   | 2.860        | ---            |

Hydrogen bond between N20...N21 consist of one donor and three acceptors. In some cases, this kind of multiple-centered hydrogen bonds has been observed.<sup>S1,S2</sup>

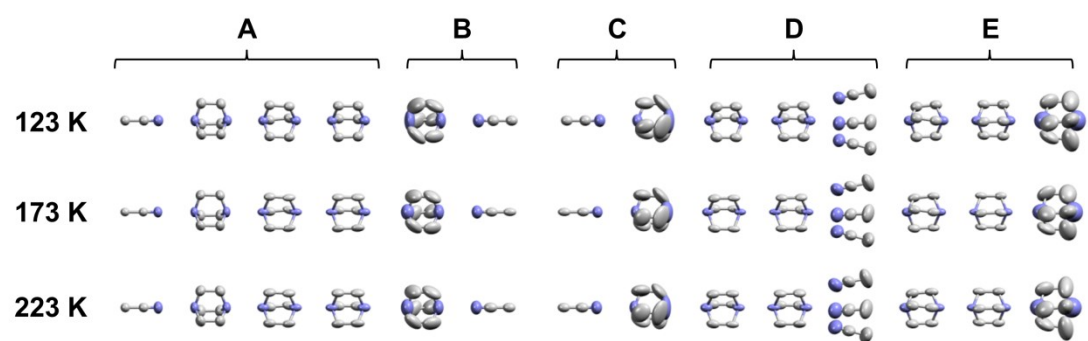

**Fig. S6** Temperature-dependence of one-dimensional HDABCO, DABCO, and CH<sub>3</sub>CN structures with thermal ellipsoid model with 50% probability.

**Table S2.** Crystal data, data collection, and reduction parameter for **1** at different temperatures.

| Temperature / K                              | 123                                                                               | 173          | 223          |
|----------------------------------------------|-----------------------------------------------------------------------------------|--------------|--------------|
| <i>Crystal Dimensions</i> / mm <sup>3</sup>  | 0.106 × 0.144 × 0.065                                                             |              |              |
| <i>Chemical formula</i>                      | C <sub>126</sub> H <sub>148</sub> N <sub>26</sub> Ni <sub>9</sub> S <sub>90</sub> |              |              |
| <i>Formula weight</i>                        | 5440.49                                                                           |              |              |
| <i>Crystal system</i>                        | Trigonal                                                                          |              |              |
| <i>Space group</i>                           | R-3                                                                               |              |              |
| <i>a</i> , Å                                 | 15.1802(2)                                                                        | 15.23710(10) | 15.28410(10) |
| <i>b</i> , Å                                 | 15.1802(2)                                                                        | 15.23710(10) | 15.28410(10) |
| <i>c</i> , Å                                 | 155.6425(13)                                                                      | 155.7837(9)  | 155.7874(9)  |
| <i>V</i> , Å <sup>3</sup>                    | 31060.9(9)                                                                        | 31322.5(4)   | 31516.8(5)   |
| <i>Z</i>                                     | 6                                                                                 |              |              |
| <i>D<sub>calc</sub></i> , g·cm <sup>-3</sup> | 1.745                                                                             | 1.730        | 1.720        |
| $\mu$ (Cu K $\alpha$ ) cm <sup>-1</sup>      | 9.776                                                                             | 9.694        | 9.634        |
| $2\theta_{\text{max}}$ , deg                 | 145.0960                                                                          | 144.6820     | 144.8880     |
| Reflections measured                         | 68632                                                                             | 32365        | 74900        |
| Independent reflections                      | 13667                                                                             | 13251        | 13824        |
| Reflections used                             | 13667                                                                             | 13251        | 13824        |
| $R_I^a$                                      | 0.0577                                                                            | 0.0502       | 0.0420       |
| $R_w(F^2)^a$                                 | 0.1634                                                                            | 0.1401       | 0.1273       |
| <i>GOF</i>                                   | 1.052                                                                             | 1.023        | 1.031        |

<sup>a</sup>  $R_1 = \Sigma||F_o| - |F_c|| / \Sigma|F_o|$  and  $R_w = (\Sigma\omega(|F_o| - |F_c|)^2 / \Sigma\omega F_o^2)^{1/2}$ .

## §6. Temperature- and frequency-dependent dielectric loss tangent and Arrhenius plot for crystal 1

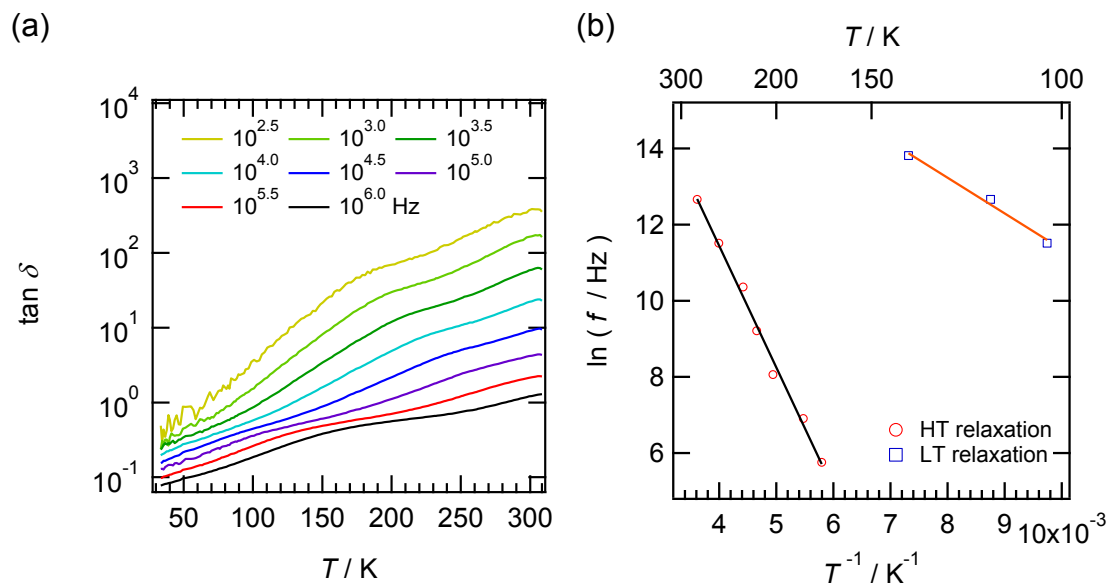

**Fig. S7.** (a) Temperature and frequency dependent dielectric loss tangent ( $\tan \delta$ ), corresponding to  $\varepsilon_1$  indicated in Fig. 3(a). (b) Arrhenius plot for the dielectric relaxation frequency ( $f$ ) of **1** and the respective fits using the Arrhenius law (see text). Red circles and blue squares correspond to relaxation in high temperatures (HT) and low temperatures (LT), respectively.

Arrhenius plot for the dielectric relaxation frequency was given in Fig. S5(b). High temperature (HT) relaxation can be fitted by Arrhenius law with activation energy ( $E_a$ ) of 26.4 kJ mol<sup>-1</sup> and pre-exponential factor ( $f_0$ ) of  $2.08 \times 10^{10}$  Hz, while the best fit for LT relaxation is Arrhenius law with  $E_a = 7.8$  kJ mol<sup>-1</sup> and  $f_0 = 1.01 \times 10^9$  Hz.

## §7. References

- S1 X. M. Ren, S. Nishihara, T. Akutagawa, S. Noro and T. Nakamura, *Inorg. Chem.*, 2006, **45**, 2229–2234.
- S2 G. A. Jeffrey, *An Introduction to Hydrogen Bonding*, Oxford University Press, New York, 1997.
